# Supplementary material for: Comparison of Intra-Annual Xylem and Phloem Formation of Picea crassifolia Stands at Two Latitudes in Northwest China
Source: MDPI journal article supplement (doi:10.3390/f12111445), 2021-10-23
Supplement: s1 [file s1]

**Table S1.** The coefficient of determination ( $R^2$ ) of the fitting model for xylem and phloem formation dynamics.

| Site      | Variables             | Mean $R^2$ |
|-----------|-----------------------|------------|
| Helanshan | Cambial cells         | 0.61       |
|           | Enlarging cells       | 0.80       |
|           | Wall thickening cells | 0.91       |
|           | Mature cells          | 0.91       |
|           | Xylem cells           | 0.90       |
|           | Early phloem cells    | 0.92       |
|           | Late phloem cells     | 0.84       |
|           | Phloem cells          | 0.95       |
|           | Xylem-phloem ratio    | 0.87       |
| Luoshan   | Cambial cells         | 0.79       |
|           | Enlarging cells       | 0.90       |
|           | Wall thickening cells | 0.90       |
|           | Mature cells          | 0.96       |
|           | Xylem cells           | 0.95       |
|           | Early phloem cells    | 0.96       |
|           | Late phloem cells     | 0.90       |
|           | Phloem cells          | 0.95       |
|           | Xylem-phloem ratio    | 0.90       |

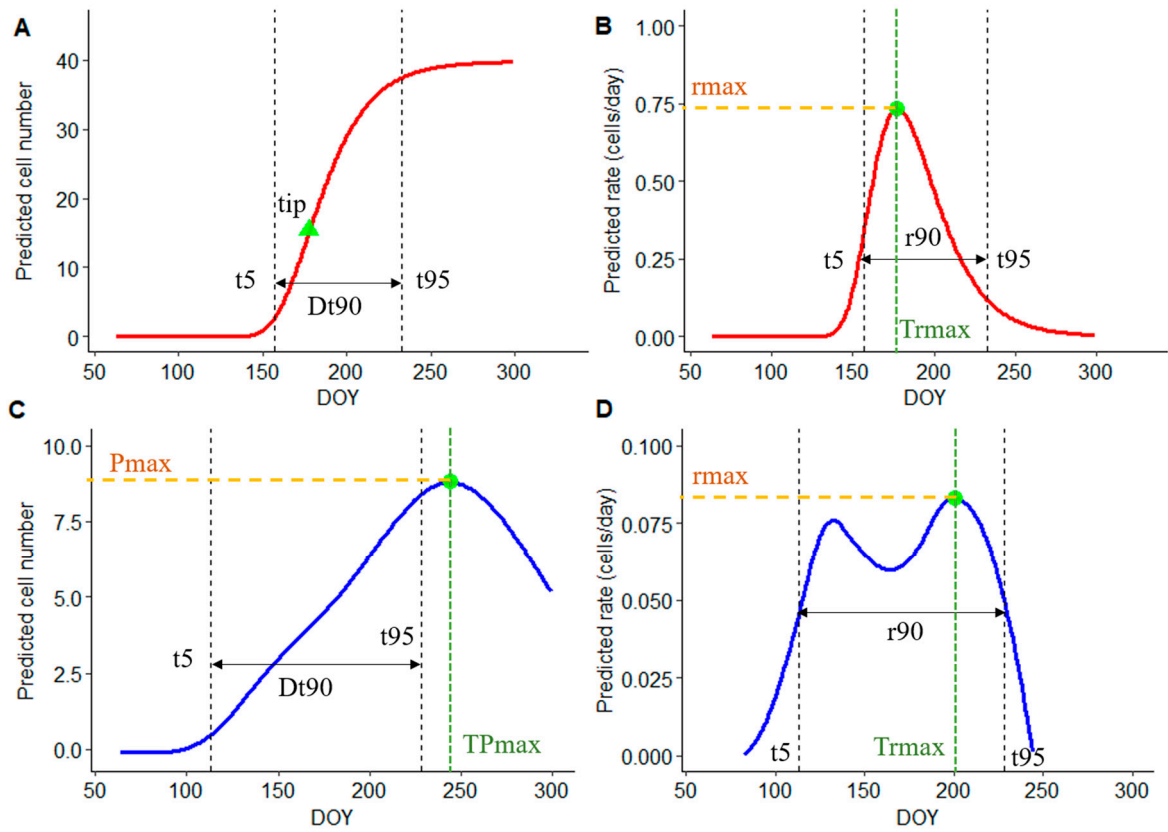

**Figure S1** The biological parameters from the Gompertz equation (A and B) and GAM function (C and D) for a monitored *Picea crassifolia* tree in Luoshan. For Gompertz function,  $t_5$  is the date at which 5 % of the cells were produced;  $tip$  is the date of the inflection point;  $t_{95}$  is the date at which 95 % of the cells were produced;  $Dt_{90}$  ( $t_{95} - t_5$ ) is the duration between 5 and 95 % of the produced cells;  $r_{max}$  is the maximal growth rate;  $r_{90}$  is the mean growth rate computed between 5 and 95 % of the produced cells and  $Tr_{max}$  is the date maximal growth rate appeared. For GAM function,  $P_{max}$  is the maximum predicted cell production;  $TP_{max}$  is the date that  $P_{max}$  appeared;  $t_5$  and  $t_{95}$  represent the first date for 5 % of maximum production and 95 % of maximum production, respectively;  $Dt_{90}$  is the duration between 5 % and 95 % of the maximum produced;  $r_{max}$  is the maximum growth rate computed from the first derivative of fitted GAM;  $Tr_{max}$  is the date maximal growth rate appeared and  $r_{90}$  is the average rate between  $t_5$  and  $t_{95}$ .
